# Supplementary material
Source: publisher site journal article supplement (https://www.dovepress.com/article/supplementary_file/553232/Supplementary%20table.docx)
Supplement: Supplementary file 1 [file Supplementary%20table.docx]

**Supplementary table 1 Intra-observer reliability analysis of ultrasound parameter measurements**

| Variables | ICC | 95% CI |
| --- | --- | --- |
| Conventional ultrasound parameters |  |  |
| T/SATrelaxed, mm | 0.989 | 0.976-0.995 |
| T/RFrelaxed, mm | 0.966 | 0.929-0.984 |
| T/RFstretched, mm | 0.973 | 0.944-0.987 |
| CSA/RFrelaxed, cm2 | 0.955 | 0.908-0.978 |
| CSA/RFstretched, cm2 | 0.964 | 0.925-0.983 |
| FE/RF | 0.897 | 0.795-0.950 |
| T/(RF+VI)relaxed, mm | 0.964 | 0.926-0.983 |
| T/(RF+VI)stretched, mm | 0.988 | 0.976-0.994 |
| SWE parameters |  |  |
| SWV/RFrelaxed, m/s | 0.875 | 0.755-0.939 |
| SWV/RFstretched, m/s | 0.845 | 0.701-0.923 |
| SWV/VIrelaxed, m/s | 0.851 | 0.710-0.926 |
| SWV/VIstretched, m/s | 0.835 | 0.682-0.918 |

**Abbreviations:** T, thickness, SAT, subcutaneous adipose tissue; RF, rectus femoris; CSA, cross-sectional area; FE, flaky myosteatosis echo; VI, vastus intermedius; SWE: shear wave elastography; SWV, shear wave velocity; ICC, intraclass correlation coefficient; CI, confidence interval.

**Supplementary table 2 Correlation between indicators**

| Indicators | Age | Sex | Weight, | BMI | SAV | T/SATrelaxed | T/RFrelaxed | T/RFstretched | T/(RF+VI)relaxed | T/(RF+VI)stretched | FE/RF | CSA/RFrelaxed | CSA/RFstretched | ΔCSA | SWV/RFrelaxed | SWV/RFstretched | ΔSWV/RF | SWV/VIrelaxed | SWV/VIstretched | ΔSWV/VI |
| --- | --- | --- | --- | --- | --- | --- | --- | --- | --- | --- | --- | --- | --- | --- | --- | --- | --- | --- | --- | --- |
| Age | 1.00 | 0.02 | -0.16 | -0.10 | -0.14 | -0.07 | -0.16 | -0.21 | -0.24 | -0.30 | 0.31 | -0.17 | -0.18 | -0.10 | -0.02 | -0.17 | -0.19 | -0.11 | -0.22 | -0.08 |
| Sex |  | 1.00 | 0.43 | -0.18 | -0.41 | **-0.74** | 0.07 | 0.36 | 0.12 | 0.31 | -0.20 | 0.34 | 0.32 | 0.10 | -0.39 | -0.18 | 0.10 | -0.12 | -0.04 | 0.10 |
| Weight, |  |  | 1.00 | **0.65** | 0.32 | -0.06 | 0.35 | 0.55 | 0.39 | 0.56 | -0.44 | 0.56 | 0.57 | 0.40 | 0.25 | 0.30 | 0.19 | 0.41 | 0.45 | 0.16 |
| BMI |  |  |  | 1.00 | **0.68** | 0.48 | 0.33 | 0.34 | 0.37 | 0.36 | -0.25 | 0.37 | 0.39 | 0.38 | 0.55 | 0.45 | 0.17 | 0.50 | 0.47 | 0.08 |
| SAV |  |  |  |  | 1.00 | **0.62** | 0.19 | 0.15 | 0.26 | 0.19 | -0.08 | 0.11 | 0.17 | 0.22 | 0.48 | 0.42 | 0.14 | 0.35 | 0.37 | 0.04 |
| T/SATrelaxed |  |  |  |  |  | 1.00 | 0.03 | -0.18 | 0.01 | -0.11 | 0.10 | -0.16 | -0.12 | 0.03 | **0.61** | 0.31 | -0.10 | 0.37 | 0.29 | -0.05 |
| T/RFrelaxed |  |  |  |  |  |  | 1.00 | **0.69** | **0.83** | **0.75** | -0.32 | **0.62** | **0.61** | 0.34 | 0.18 | 0.36 | 0.24 | 0.31 | 0.44 | 0.24 |
| T/RFstretched |  |  |  |  |  |  |  | 1.00 | **0.61** | **0.85** | -0.45 | **0.77** | **0.81** | 0.58 | 0.08 | 0.39 | 0.34 | 0.23 | 0.48 | 0.35 |
| T/(RF+VI)relaxed |  |  |  |  |  |  |  |  | 1.00 | **0.80** | -0.30 | 0.54 | 0.54 | 0.33 | 0.14 | 0.28 | 0.21 | 0.35 | 0.42 | 0.18 |
| T/(RF+VI)stretched |  |  |  |  |  |  |  |  |  | 1.00 | -0.39 | **0.69** | **0.74** | 0.54 | 0.15 | 0.35 | 0.26 | 0.33 | 0.48 | 0.27 |
| FE/RF |  |  |  |  |  |  |  |  |  |  | 1.00 | -0.49 | -0.45 | -0.28 | -0.12 | -0.28 | -0.24 | -0.21 | -0.40 | -0.32 |
| CSA/RFrelaxed |  |  |  |  |  |  |  |  |  |  |  | 1.00 | **0.92** | 0.47 | 0.12 | 0.46 | 0.40 | 0.30 | 0.44 | 0.24 |
| CSA/RFstretched |  |  |  |  |  |  |  |  |  |  |  |  | 1.00 | **0.74** | 0.13 | 0.42 | 0.35 | 0.29 | 0.45 | 0.25 |
| ΔCSA |  |  |  |  |  |  |  |  |  |  |  |  |  | 1.00 | 0.23 | 0.29 | 0.20 | 0.22 | 0.36 | 0.22 |
| SWV/RFrelaxed |  |  |  |  |  |  |  |  |  |  |  |  |  |  | 1.00 | 0.45 | -0.20 | 0.55 | 0.40 | -0.07 |
| SWV/RFstretched |  |  |  |  |  |  |  |  |  |  |  |  |  |  |  | 1.00 | **0.71** | 0.36 | **0.60** | 0.34 |
| ΔSWV/RF |  |  |  |  |  |  |  |  |  |  |  |  |  |  |  |  | 1.00 | -0.02 | 0.34 | 0.45 |
| SWV/VIrelaxed |  |  |  |  |  |  |  |  |  |  |  |  |  |  |  |  |  | 1.00 | **0.60** | -0.29 |
| SWV/VIstretched |  |  |  |  |  |  |  |  |  |  |  |  |  |  |  |  |  |  | 1.00 | 0.56 |
| ΔSWV/VI |  |  |  |  |  |  |  |  |  |  |  |  |  |  |  |  |  |  |  | 1.00 |

**Note:** Bold text indicates |*r*| ≥0.6.

**Abbreviations:** BMI, body mass index; SAV, subcutaneous adipose volume; T, thickness, SAT, subcutaneous adipose tissue; RF, rectus femoris; VI, vastus intermedius; FE, flaky myosteatosis echo; CSA, cross-sectional area; SWV, shear wave velocity; ΔCSA, CAS/RFstretched－CSA/RFrelaxed; ΔSWV/RF, SWV/RFstretched－SWV/RFrelaxed; ΔSWV/VI, SWV/VIstretched－SWV/VIrelaxed.
